# Supplementary material for: The Interplay of Mitochondrial Oxidative Stress and Endoplasmic Reticulum Stress in Cardiovascular Fibrosis in Obese Rats
Source: MDPI journal article supplement (doi:10.3390/antiox10081274), 2021-08-11
Supplement: s1 [file s1]

# The interplay of mitochondrial oxidative stress and endoplasmic reticulum stress in cardiovascular fibrosis in obese rats

Francisco V Souza-Neto<sup>1†</sup>, Sara Jiménez-González<sup>1†</sup>, Beatriz Delgado-Valero<sup>1</sup>, Raquel Jurado-López<sup>1</sup>, Marie Genty<sup>1</sup>, Ana Romero-Miranda<sup>1</sup>, Cristina Rodríguez<sup>2,3,4</sup>, María Luisa Nieto<sup>4,5</sup>, Ernesto Martínez-Martínez<sup>1,4</sup>, \* and Victoria Cachafeiro<sup>1,4,\*</sup>

<sup>1</sup> Departamento de Fisiología, Facultad de Medicina, Universidad Complutense de Madrid-Instituto de Investigación Sanitaria Gregorio Marañón (IISGM), Madrid, Spain. franvasc@ucm.es (FV.S-N.); saraji02@ucm.es (S. J-G.); beadel02@ucm.es (B.D-V.); rajurado@ucm.es (R.J-L.); marie.gentygau@gmail.com (M.G.); anarom12@ucm.es (A. R-M.).

<sup>2</sup> Institut de Recerca del Hospital de la Santa Creu i Sant Pau, Barcelona, Spain. crodriguez@santpau.cat (C.R.).

<sup>3</sup> Instituto de Investigación Biomédica Sant Pau (IB Sant Pau), 08025 Barcelona, Spain.

<sup>4</sup> Ciber de Enfermedades Cardiovasculares (CIBERCV), Instituto de Salud Carlos III, Madrid, Spain.

<sup>5</sup> Instituto de Biología y Genética Molecular, CSIC-Universidad de Valladolid, Valladolid, Spain. ml.nieto@csic.es (ML.N.).

\* These authors contributed equally to this work. Correspondence: ernmarti@ucm.es; Tel.: +34 913941483 (E.M-M.); vcara@ucm.es; Tel: +34 913941489 (V.C.).

† These authors contributed equally to this study.

This file includes:

1 supplemental table

6 supplemental figures

# SUPPLEMENTAL TABLES

**Table S1. Primers used in real time PCR analysis**

| Gene           | Primer  | Sequence (5' to 3')     |
|----------------|---------|-------------------------|
| <i>Col 1a1</i> | Forward | GCCTCCCAGAACATCACCTA    |
|                | Reverse | ATGTCTGTCTTGCCCCAAGT    |
| <i>Tgf-β</i>   | Forward | CAGAAAGTTGGCATGGTAGCC   |
|                | Reverse | TGCTTCAGCTCCACAGAGAA    |
| <i>Hprt</i>    | Forward | AGGACCTCTCGAAGTGT       |
|                | Reverse | ATTCAAATCCCTGAAGTACTCAT |

*Col1a1*: Collagen type I; *Tgf-β*: Transforming growth factor-beta and *Hprt*: hypoxanthine-guanine phosphoribosyltransferase.

# SUPPLEMENTAL FIGURES

**A**

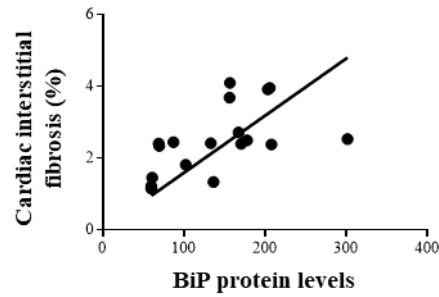

**B**

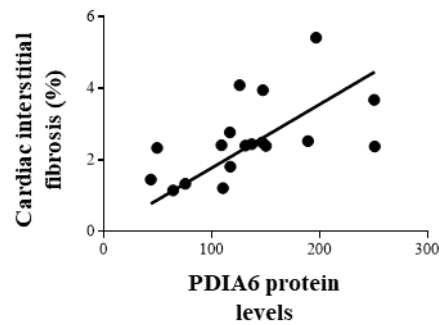

**C**

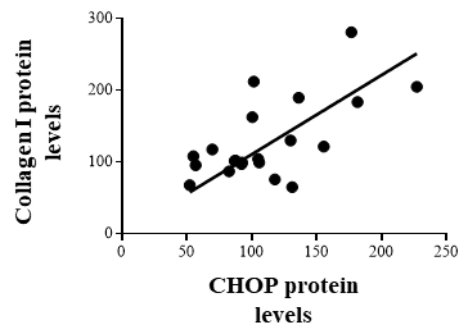

**Figure S1. Correlations observed between cardiac fibrosis and endoplasmic reticulum stress.** Direct correlation between cardiac interstitial fibrosis and (A) immunoglobulin binding protein (BiP;  $r=0.5475$ ;  $p=0.0187$ ); (B) protein disulfide isomerase family A member 6 (PDIA6;  $r=0.5534$ ;  $p=0.0172$ ) protein expression in all animals. (C) Direct correlation between cardiac CCAAT-enhancer-binding protein homologous protein (CHOP) and collagen type I protein expression in all animals ( $r=0.6385$ ;  $p=0.0018$ ).

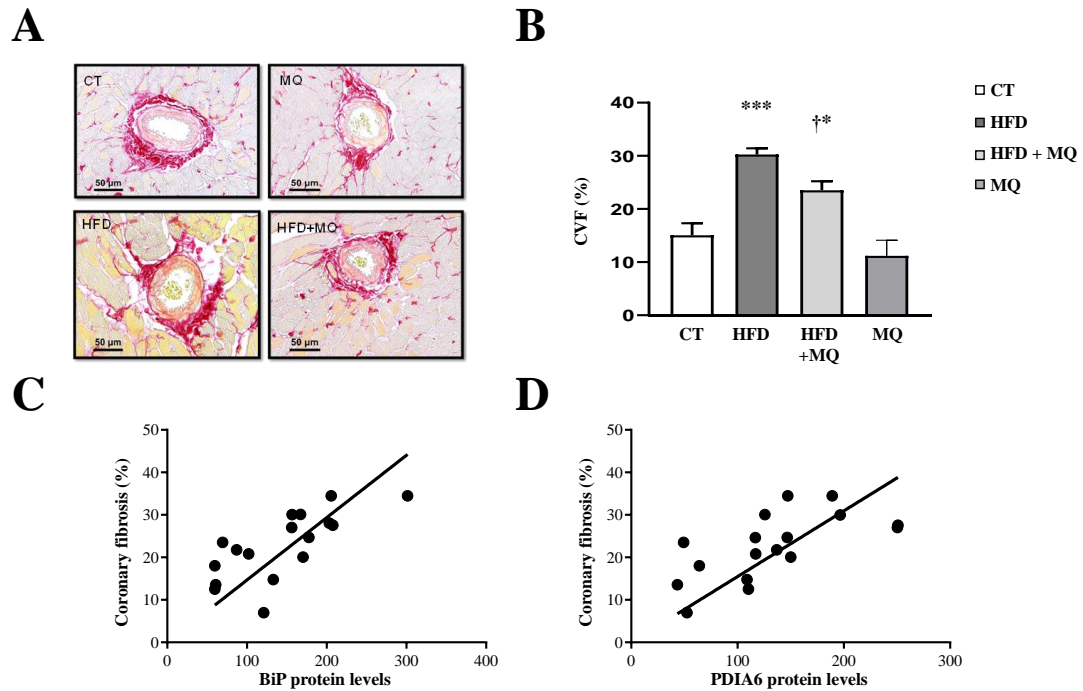

**Figure S2. Mitochondrial oxidative stress mediates the fibrosis of the media of the descending coronary artery.** (A) Representative microphotographs of cardiac sections staining with picrosirius red and (B) quantification of collagen volume fraction in the media of the coronary artery from control rats fed a normal chow (CT) and rats fed a high fat diet (HFD) treated with vehicle or with the mitochondrial antioxidant MitoQ (MQ; 200  $\mu$ M). Scale bar: 50  $\mu$ m. Bars graphs represent the mean  $\pm$  SEM of 6-8 animals. \*\* $p$ <0.01; \*\*\* $p$ <0.001 vs. control group. † $p$ <0.05 vs. HFD group. Direct correlation between coronary media fibrosis and (C) immunoglobulin binding protein (BiP;  $r=0.7207$ ;  $p=0.0011$ ); (D) protein disulfide isomerase family A member 6 (PDIA6;  $r=0.6460$ ;  $p=0.0051$ ) protein expression in all animals.

**A**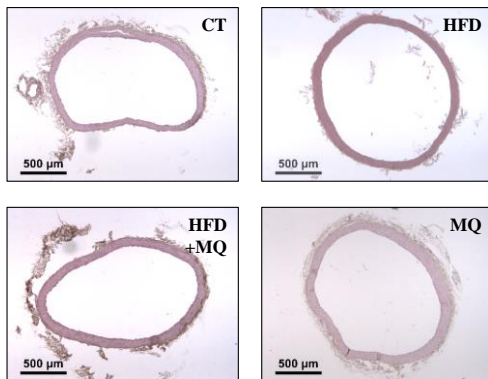**B**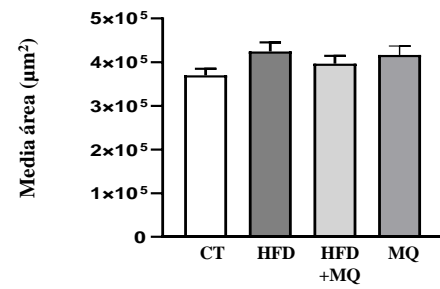**C**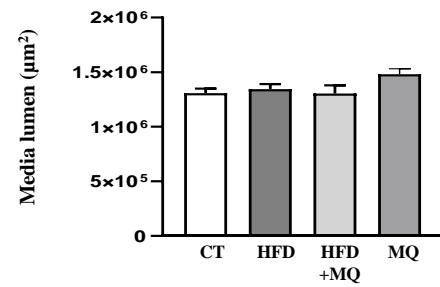

**Figure S3. Vascular morphology of aorta in the animals.** (A) Representative microphotographs of aortas stained with hematoxylin/eosin. (B) Media and (C) lumen area from control rats fed a normal chow (CT) and rats fed a high fat diet (HFD) treated with vehicle or with the mitochondrial antioxidant MitoQ (MQ; 200 μM). Scale bar: 500 μm. Bars graphs represent the mean ± SEM of 6-8 animals.

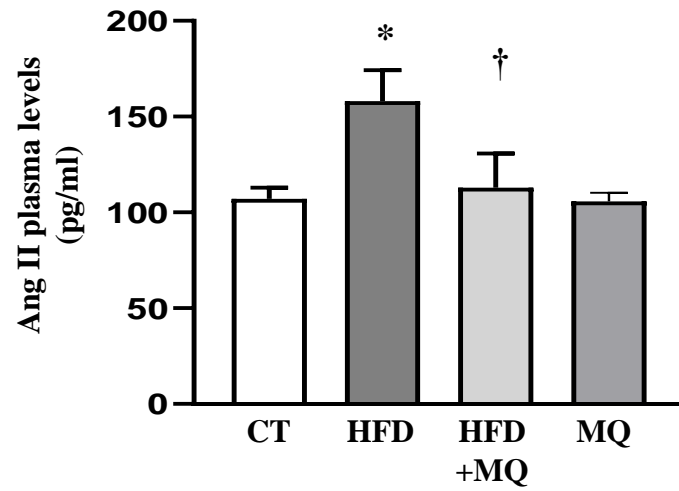

**Figure S4. Angiotensin (Ang II) plasma levels** from control rats fed a normal chow (CT) and rats fed a high fat diet (HFD) treated with vehicle or with the mitochondrial antioxidant MitoQ (MQ; 200  $\mu$ M). Bars graphs represent the mean  $\pm$  SEM of 5-8 animals. \* $p < 0.05$  vs. control group. † $p < 0.05$  vs. HFD group.

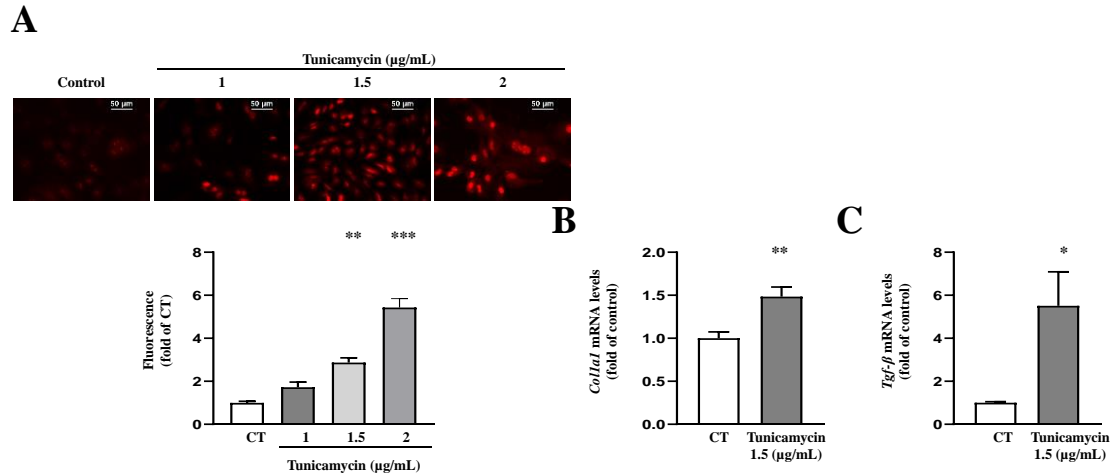

**Figure S5. Endoplasmic reticulum stress increases oxidative stress and extracellular matrix markers in vascular smooth muscle cells.** Effects of the endoplasmic reticulum stress inducer, tunicamycin (1-2 µg/mL) on superoxide anion production. **(A)** Representative microphotographs and quantification of cells labelled with the oxidative dye dihydroethidium (magnification 40X). mRNA levels of **(B)** collagen type I (*Col 1a1*), and **(C)** transforming growth factor-beta (*Tgf-β*) in vascular smooth muscle cells treated with tunicamycin (1.5 µg/mL) for 24 hours. Bars graphs represent the mean ± SEM of four to six assays normalized for hypoxanthine phosphoribosyltransferase (HPRT). \* $p < 0.05$ ; \*\* $p < 0.01$ , \*\*\* $p < 0.001$  vs. control cells.

**A**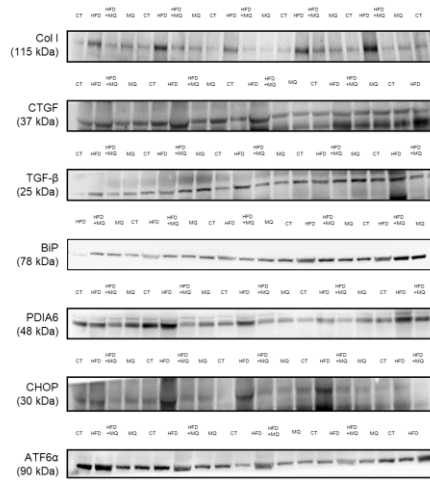**B**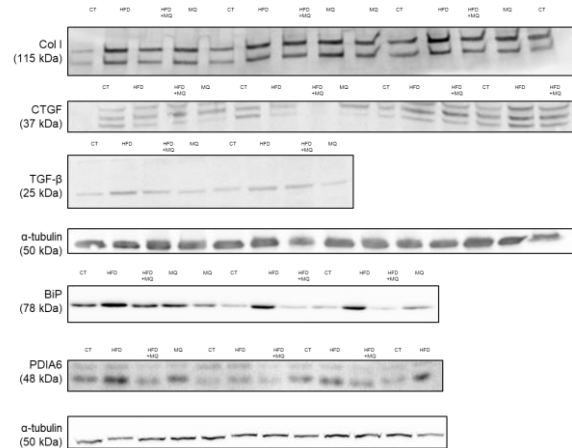**C**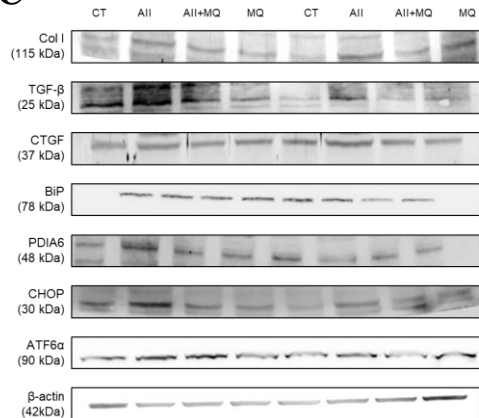**D**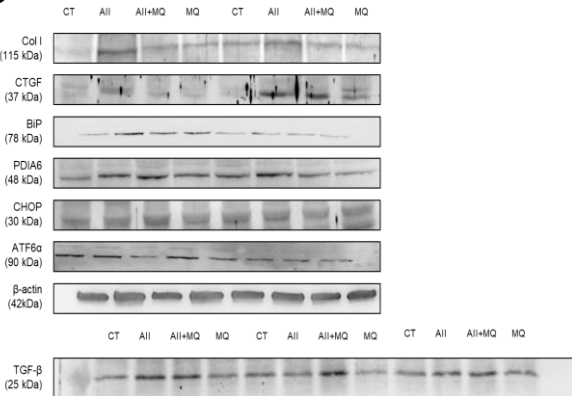**E**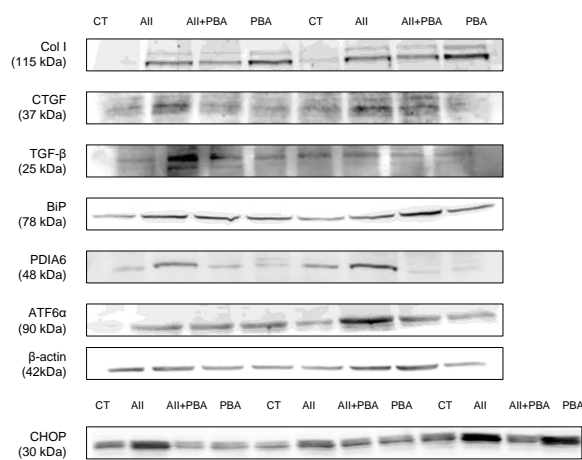**F**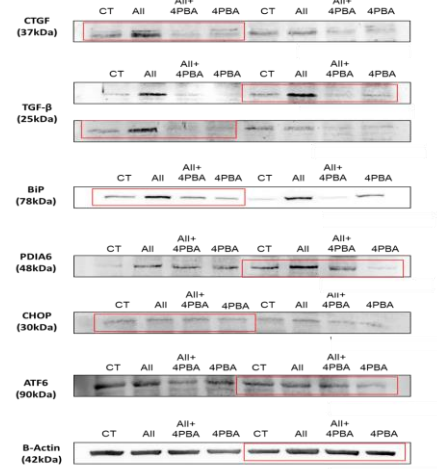

**Figure S6. Original blots corresponding to (A) Figure 1; (B) Figure 2; (C) Figure 3; (D) Figure 4; (E) Figure 5 and (F) Figure 6.**
